# Supplementary material for: Effective Oral Favipiravir (T-705) Therapy Initiated after the Onset of Clinical Disease in a Model of Arenavirus Hemorrhagic Fever
Source: PLoS Negl Trop Dis. 2011 Oct 11;5(10):e1342. doi: 10.1371/journal.pntd.0001342 (PMC3191123; doi:10.1371/journal.pntd.0001342)
Supplement: Table S1 — Hematological values during the course of PICV infection in guinea pigsa. a Groups of guinea pigs (n = 3) were sacrificed daily through the course of PICV infection and whole blood was collected for hematologic analysis. b The day-10 group (n = 4) included a moribund guinea pig from the day-11 group. c The day-11 group consisted of 2 guinea pigs. d Total WBC and Gra were significantly increased on day 7 compared to day 1 (P<0.05). e PLT and PCT were significantly lower on days 5–10 and 6–11, respectively, compared to day 1 (P<0.05). f PDW could not be accurately calculated due to depleted platelet counts on days 8–11. WBC, white blood cells; Lym, lymphocytes; Mon, monocytes; Gra, granulocytes; RBC, red blood cells; MCV, mean corpuscular volume; HCT, hematocrit; MCH, mean corpuscular hemoglobin; MCHC, mean corpuscular hemoglogin concentration; RDW, red cell distribution width; Hb, hemoglobin; PLT, platelets; MPV, mean platelet volume; PCT, plateletcrit; and PDW, platelet distribution width. (DOC) [file pntd.0001342.s002.doc]

| **Blood component**  **(units)** | **Day post-infection** | | | | | | | | | |
| --- | --- | --- | --- | --- | --- | --- | --- | --- | --- | --- |
| **1** | **3** | **4** | **5** | **6** | **7** | **8** | **9** | **10b** | **11c** |
| WBC (m/mm3) | 2.2  0.5 | 2.8  0.9 | 4.7  0.7 | 3.6  0.7 | 3.8  1.2 | 7.7  1.4d | 4.3  1.0 | 3.2  0.9 | 3.3  1.0 | 3.5  0.1 |
| Lym (m/mm3) | 0.8  0.3 | 1.0  0.5 | 1.4  0.1 | 1.2  0.5 | 1.2  0.4 | 1.5  0.3 | 0.9  0.2 | 1.0  0.3 | 0.9  0.3 | 1.0  0.4 |
| Mon (m/mm3) | 0.1  0.0 | 0.1  0.1 | 0.2  0.0 | 0.1  0.1 | 0.2  0.1 | 0.2  0.1 | 0.2  0.1 | 0.2  0.1 | 0.2  0.1 | 0.2  0.0 |
| Gra (m/mm3) | 1.3  0.3 | 1.7  0.6 | 3.1  0.7 | 2.3  0.5 | 2.5  0.9 | 6.0  1.5d | 3.3  1.0 | 2.1  0.7 | 2.3  0.7 | 2.4  0.2 |
| RBC (m/mm3) | 6.0  0.2 | 5.5  0.5 | 5.7  0.2 | 5.3  0.2 | 5.0  0.4 | 5.4  0.4 | 5.5  0.2 | 5.5  0.2 | 5.0  0.5 | 5.1  0.8 |
| MCV (fL) | 84.4  2.6 | 83.9  0.6 | 84  2.7 | 80.1  3.4 | 80.3  1.3 | 81.7  2.4 | 86.0  1.3 | 80.6  3.4 | 80.9  2.7 | 78.1  4.3 |
| HCT (%) | 50.1  0.5 | 46.4  3.8 | 47.5  2.3 | 42.3  1.1 | 40.5  2.7 | 44.3  2.4 | 47.3  2.5 | 44.4  3.2 | 40.6  3.1 | 40.3  8.3 |
| MCH (pg) | 25.1  1.1 | 25.9  1.8 | 25.2  0.9 | 26.2  0.4 | 26.7  0.8 | 26.6  0.8 | 27.2  2.1 | 26.6  0.8 | 26.7  1.7 | 26.1  0.6 |
| MCHC (g/dl) | 29.7  0.5 | 30.9  2.3 | 30.1  0.4 | 32.8  1.9 | 33.2  0.5 | 32.5  0.8 | 31.8  2.5 | 33.0  1.1 | 33.1  1.6 | 33.5  2.7 |
| RDW | 9.3  0.5 | 10.0  1.1 | 9.7  0.7 | 10.1  0.6 | 9.4  0.8 | 9.2  0.3 | 8.8  0.5 | 9.3  0.2 | 9.2  0.6 | 8.6  0.4 |
| Hb (g/dl) | 14.9  0.2 | 14.3  0.8 | 14.3  0.6 | 13.9  0.8 | 13.5  1.0 | 14.4  0.6 | 15.0  1.6 | 14.7  0.7 | 13.4  1.1 | 13.4  1.7 |
| PLT (m/mm3) | 173  16 | 158  50 | 137  17 | 89  25e | 51  12e | 70  9e | 24  6e | 37  8e | 23  10e | 27  32 |
| MPV (fL) | 7.3  0.3 | 7.0  0.5 | 7.4  0.4 | 7.3  0.3 | 7.1  0.1 | 7.9  0.6 | 7.9  0.6 | 7.3  0.5 | 7.3  0.5 | 8.2  0.5 |
| PCT (%) | 0.13  0.02 | 0.11  0.04 | 0.10  0.02 | 0.07  0.02 | 0.04  0.01e | 0.05  0.01e | 0.02  0.01e | 0.03  0.01e | 0.02  0.0e | 0.02  0.03e |
| PDW | 8.3  1.1 | 9.0  0.9 | 7.8  2.3 | 6.8  5.9 | 6.9  6.0 | 6.7  5.9 | -f | -f | -f | -f |

a Groups of guinea pigs (n=3) were sacrificed daily through the course of PICV infection and whole blood was collected for hematologic analysis.

b The day-10 group (n=4) included a moribund guinea pig from the day-11 group.

c The day-11 group consisted of 2 guinea pigs.

d Total WBC and Gra were significantly increased on day 7 compared to day 1 (*P* < 0.05).

e PLT and PCT were significantly lower on days 5-10 and 6-11, respectively, compared to day 1 (*P* < 0.05).

f PDW could not be accurately calculated due to depleted platelet counts on days 8-11.

WBC, white blood cells; Lym, lymphocytes; Mon, monocytes; Gra, granulocytes; RBC, red blood cells; MCV, mean corpuscular volume; HCT, hematocrit; MCH, mean corpuscular hemoglobin; MCHC, mean corpuscular hemoglogin concentration; RDW, red cell distribution width; Hb, hemoglobin; PLT, platelets; MPV, mean platelet volume; PCT, plateletcrit; and PDW, platelet distribution width.
